# Supplementary material
Source: Springer Nature journal article supplement (https://www.springermedizin.de/resource/supplementary/13221_2014_83_MOESM6_ESM.pdf/9680924)
Supplement: MOESM6 [file 9680924]

Additional file 6

A. Xenograft tissue

| Score | MVD (per mm <sup>2</sup> ) |                      | Pericyte coverage (%) |                      |
|-------|----------------------------|----------------------|-----------------------|----------------------|
|       | over                       | less than ( $\leq$ ) | over                  | less than ( $\leq$ ) |
| 6     | 125                        | -                    | 0                     | 5                    |
| 5     | 100                        | 125                  | 5                     | 10                   |
| 4     | 75                         | 100                  | 10                    | 15                   |
| 3     | 50                         | 75                   | 15                    | 20                   |
| 2     | 25                         | 50                   | 20                    | 25                   |
| 1     | 0                          | 25                   | 25                    | 30                   |
| 0     | -                          | -                    | 30                    | -                    |

B. Human tumor specimens

| Score | MVD (per mm <sup>2</sup> ) |                      | Pericyte coverage (%) |                      |
|-------|----------------------------|----------------------|-----------------------|----------------------|
|       | over                       | less than ( $\leq$ ) | over                  | less than ( $\leq$ ) |
| 6     | 500                        | 600                  | 0                     | 5                    |
| 5     | 400                        | 500                  | 5                     | 10                   |
| 4     | 300                        | 400                  | 10                    | 15                   |
| 3     | 200                        | 300                  | 15                    | 20                   |
| 2     | 100                        | 200                  | 20                    | 25                   |
| 1     | 0                          | 100                  | 25                    | 30                   |
| 0     | -                          | -                    | 30                    | -                    |
